# Supplementary material for: Artificial Neural Network Correlation and Biostatistics Evaluation of Physiological and Molecular Parameters in Healthy Young Individuals Performing Regular Exercise
Source: Front Physiol. 2019 Oct 2;10:1242. doi: 10.3389/fphys.2019.01242 (PMC6797842; doi:10.3389/fphys.2019.01242)
Supplement: Supplementary file 1 [file Data_Sheet_1.xlsx]

## Sheet:  03 
Participant No.:	Actigraph sedentary status0	Actigraph sedentary status3	Zscore	Absolute	Cluster	Resting HR0	Resting HR3	Zscore	Absolute	Cluster	Recovery HR0	Recovery HR3	Zscore	Absolute	Cluster	Systolic BP0	Systolic BP3	Zscore	Absolute	Cluster	Diastolic BP0	Diastolic BP3	Zscore	Absolute	Cluster	6minuteWT0	6minuteWT3	Zscore	Absolute	Cluster	relVO2max0	relVO2max3	Zscore	Absolute	Cluster	BodyFat%0	BodyFat%3	Zscore	Absolute	Cluster	Cluster	MuscleMass%0	MuscleMass%3	Zscore	Absolute	Cluster	Cluster	Glucose0	Glucose3
1	4269	3065	-0.39556	-1204	2	66	63	-0.28368	-3	1	111	96	-1.2942	-15	1	125	114	-0.49201	-11	1	85	76	-0.61869	-9	1	672	682	-0.23981	10	1	30.8006	38.4586	1.11567	7.65796	2	32.6	31.6	0.29362	-1	2	2	27.4	28.4	0.27086	1	2	1	4.54	3.95
2	3649	2176	-0.64086	-1473	2	66	71	0.90506	5	2	83	88	0.04641	5	2	145	135	-0.37325	-10	1	101	98	-0.15049	-3	1	683	710	0.36737	27	2	33.1115	44.3322	1.83404	11.2207	2	30.3	29.9	0.63043	-0.4	2	2	27.7	27.9	-0.51163	0.2	2	2	4.61	4.83
3	2294	2710	1.08169	416	1	91	87	-0.43227	-4	1	67	88	1.11889	21	2	121	124	1.17064	3	2	80	60	-1.47706	-20	1	669	693	0.26022	24	2	42.6269	42.4712	-0.50579	-0.155669	1	32.9	30.7	-0.37998	-2.2	2	1	28	29.8	1.05335	1.8	2	1	4.42	4.2
4	4131	2950	-0.37459	-1181	2	52	60	1.35083	8	2	78	66	-1.09311	-12	1	101	97	0.33932	-4	2	69	69	0.08361	0	1	611	600	-0.98985	-11	1	40.1375	37.873	-0.93681	-2.26453	1	33.3	31.7	-0.04318	-1.6	2	2	26.6	26.9	-0.41382	0.3	2	2	4.41	4.54
5	5485	4167	-0.49952	-1318	2	55	49	-0.72945	-6	1	60	93	1.92326	33	2	106	94	-0.61077	-12	1	76	66	-0.69673	-10	1	664	665	-0.56126	1	1	32.4221	25.2322	-1.94253	-7.18987	1	28.2	24.8	-1.05359	-3.4	2	1	27	27.8	0.07524	0.8	2	1	5.27	4.96
6	4128	5235	1.7118	1107	1	55	50	-0.58086	-5	1	83	95	0.51562	12	2	110	107	0.45808	-3	2	63	87	1.95641	24	2	708	765	1.43886	57	2	42.7659	49.5278	0.93095	6.76191	2	17.9	16.6	0.12522	-1.3	2	2	40.4	41.3	0.17305	0.9	2	1	4.4	4.36
7	6578	4019	-1.63117	-2559	2	62	x	x	x	x	x	x	x	x	x	112	103	-0.25449	-9	1	76	70	-0.38459	-6	1	668	746	2.1889	78	2	47.8991	49.2791	-0.17739	1.37999	1	27.9	27.5	0.63043	-0.4	2	2	31.2	31.3	-0.60944	0.1	2	2	5.35	5.09
8	3913	4363	1.11269	450	1	85	70	-2.06678	-15	1	79	70	-0.89202	-9	1	104	108	1.2894	4	2	68	75	0.62984	7	2	674	690	-0.02551	16	1	44.5591	42.429	-0.89576	-2.13003	1	31.3	32.1	1.30403	0.8	2	2	29.1	28.1	-1.68536	-1	2	2	4.61	4.93
9	3574	4134	1.213	560	1	65	62	-0.28368	-3	1	96	79	-1.42827	-17	1	123	111	-0.61077	-12	1	75	67	-0.54066	-8	1	676	683	-0.34696	7	1	32.3851	34.7952	0.02786	2.4101	1	36.8	34.2	-0.60452	-2.6	2	1	25.4	26.3	0.17305	0.9	2	1	4.58	4.29
10	3144	2174	-0.18218	-970	2	x	56	x	x	x	66	75	0.31453	9	2	121	99	-1.79838	-22	1	67	63	-0.22853	-4	1	608	600	-0.8827	-8	1	38.7719	39.9558	-0.21844	1.18384	1	43.9	33.6	Outlier	-10.3	1		25.4	27.2	1.05335	1.8	2	1	5.23	5.28
11	1938	1327	0.14519	-611	1	76	78	0.45928	2	2	95	91	-0.55687	-4	1	100	92	-0.13573	-8	1	65	53	-0.85279	-12	1	713	725	-0.16838	12	1	32.2948	39.717	1.0541	7.42218	2	30.5	29.8	0.46202	-0.7	2	2	26.9	28.3	0.66211	1.4	2	1	5.48	4.79
12	3366	1733	-0.78676	-1633	2	x	73	x	x	x	90	100	0.38156	10	2	113	123	2.00197	10	2	56	80	1.95641	24	2	741	707	-1.81133	-34	1	40.3894	41.8594	-0.15687	1.47006	1	18.1	13.8	-1.55879	-4.3	2	1	35.8	43.8	Outlier	8	1		5.12	5.01
13	4306	4108	0.52179	-198	1	71	78	1.20224	7	2	71	85	0.64968	14	2	111	105	0.1018	-6	1	70	78	0.70787	8	2	585	618	0.58167	33	2	37.1186	36.376	-0.60841	-0.742578	1	39.9	41.4	1.69697	1.5	2	2	26.7	25.6	-1.78317	-1.1	2	2	5	4.84
14	5079	2910	-1.27553	-2169	2	77	79	0.45928	2	2	85	94	0.31453	9	2	126	110	-1.08581	-16	1	80	74	-0.38459	-6	1	630	652	0.18879	22	1	28.811	33.3886	0.4794	4.57759	2	38.2	34	-1.50266	-4.2	2	1	25.4	27.7	1.54241	2.3	2	1	4.41	4.54
Zscore values
	Participant:	Actigraph sedentary status 03					RestingHR03				RecoveryHR03					SystolicBP03					DiastolicBP03					6MWT03					relVO2max					BodyFat%						MuscleMass%						Glucose03
		Low PA	High PA				1	2			1	2				1	2				1	2				1	2				1	2				1	2					1	2					1	2
		1.08169	-0.39556				-0.28368	0.90506			-1.2942	0.04641				-0.49201	1.17064				-0.61869	1.95641				-0.23981	0.36737				-0.50579	1.11567				-0.37998	0.29362					0.27086	-0.51163					-1.57409	1.19768
Absolute= (m2-m1)		1.7118	-0.64086				-0.43227	1.35083			-1.09311	1.11889				-0.37325	0.33932				-0.15049	0.62984				-0.98985	0.26022				-0.93681	1.83404				-1.05359	0.63043					1.05335	-0.41382					-0.30797	0.8897
Missing values (X)		1.11269	-0.37459				-0.72945	0.45928			-0.89202	1.92326				-0.61077	0.45808				-1.47706	1.95641				-0.56126	1.43886				-1.94253	0.93095				-0.60452	-0.04318					0.07524	-0.60944					-0.61595	0.30797
		1.213	-0.49952				-0.58086	1.20224			-1.42827	0.51562				-0.25449	1.2894				0.08361	0.70787				-0.02551	2.1889				-0.17739	1.0541				-1.55879	0.12522					0.17305	-1.68536					-0.44485	1.53987
		0.14519	-1.63117				-2.06678	0.45928			-0.55687	0.31453				-0.61077	2.00197				-0.69673					-0.34696	0.58167				-0.89576	0.4794				-1.50266	0.63043					0.17305	-1.78317					-0.54751	0.61595
		0.52179	-0.18218				-0.28368					0.38156				-1.79838					-0.38459					-0.8827					0.02786						1.30403					1.05335						-1.91628	0.06844
			-0.78676			Mean:	-0.729453	0.875338				0.64968				-0.13573					-0.54066					-0.16838					-0.21844						0.46202					0.66211							-0.10266
			-1.27553			SD:	0.677683	0.412326				0.31453				0.1018					-0.22853					-1.81133					-0.15687						1.69697					1.54241							0.8897
	Mean:	0.96436	-0.620647							Mean:	-1.05289	0.783742				-1.08581					-0.85279					0.18879					-0.60841				Mean:	-1.01991	0.327304			#DIV/0!	Mean:	0.34911	-1.00068				Mean:	-0.698074	0.910234
	SD:	0.551936	0.517629							SD:	0.343756	0.749422			Mean:	-0.584379	1.05188				-0.38459				Mean:	-0.537446	0.967404			Mean:	-0.601571	1.08283			SD:	0.525983	0.301248			#DIV/0!	SD:	0.399711	0.674114				SD:	0.50327	0.481875
															SD:	0.565761	0.67704			Mean:	-0.525052	1.31263			SD:	0.612147	0.825116			SD:	0.604875	0.488215
Absolute change values
		Actigraph sedentary status 03					RestingHR03				RecoveryHR03					SystolicBP03					DiastolicBP03					6MWT03					relVO2max					BodyFat%						MuscleMass%						Glucose03
		Low PA	High PA				1	2			1	2				1	2				1	2				1	2				1	2				1	2					1	2					1	2
		416	-1204				-3	5			-15	5				-11	3				-9	24				10	27				-0.155669	7.65796				-2.2	-1					1	0.2					-0.59	0.22
		1107	-1473				-4	8			-12	21				-10	-4				-3	7				-11	24				-2.26453	11.2207				-3.4	-0.4					1.8	0.3					-0.22	0.13
		450	-1181				-6	2			-9	33				-12	-3				-20	24				1	57				-7.18987	6.76191				-2.6	-1.6					0.8	0.1					-0.31	-0.04
		560	-1318				-5	7			-17	12				-9	4				0	8				16	78				1.37999	7.42218				-4.3	-1.3					0.9	-1					-0.26	0.32
		-611	-2559				-15	2			-4	9				-12	10				-10					7	33				-2.13003	4.57759				-4.2	-0.4					0.9	-1.1					-0.29	0.05
		-198	-970				-3					10				-22					-6					-8					2.4101						0.8					1.8						-0.69	-0.11
			-1633			Mean:	-6	4.8				14				-8					-8					12					1.18384						-0.7					1.4							-0.16
			-2169			SD:	4.5607	2.77489				9				-6					-4					-34					1.47006						1.5					2.3							0.13
	Mean:	287.333	-1450.83							Mean:	-11.4	16				-16					-12					22					-0.742578				Mean:	-3.34	-0.94				Mean:	1.3625	-0.3				Mean:	-0.393333	0.095
	SD:	605.271	567.645							SD:	5.12835	11.1803			Mean:	-11.7778	2				-6				Mean:	1.66667	43.8			Mean:	-0.670966	7.52806			SD:	0.937017	0.536656				SD:	0.552753	0.689202				SD:	0.196027	0.16109
															SD:	4.76387	5.70088			Mean:	-7.8	15.75			SD:	17.1391	23.1019			SD:	2.94021	2.39561
																				SD:	5.55378	9.53502
Figure legend: Raw data, absolute changes and Z-score values of tested parameters at program start (0) and after 3 months of exercise (3)
[truncated: 40 more columns]

## Sheet: 06 
Participant No.:	Actigraph sedentary status0	Actigraph sedentary status6	Zscore	Absolute	Cluster	Resting HR0	Resting HR6	Zscore	Absolute	Cluster	Recovery HR0	Recovery HR6	Zscore	Absolute	Cluster	Systolic BP0	Systolic BP6	Zscore	Absolute	Cluster	Diastolic BP0	Diastolic BP6	Zscore	Absolute	Cluster	6minuteWT0	6minuteWT6	Zscore	Absolute	Cluster	relVO2max0	relVO2max6	Zscore	Absolute	Cluster	BodyFat%0	BodyFat%6	Zscore	Absolute	Cluster	MuscleMass%0	MuscleMass%6	Zscore	Absolute	Cluster	Glucose0	Glucose6	Zscore	Absolute
1	4269	4143	0.27964	-126	1	66	57	-0.37525	-9	1	111	117	-0.17122	6	2	125	111	-0.66812	-14	2	85	76	-0.7528	-9	2	672	712	-0.53202	40	1	30.8006	35.7192	0.21078	4.9186	1	32.6	34	0.94234	1.4	1	27.4	26.9	-0.51481	-0.5	1	4.54	4.2	-0.23553	-0.34
2	3649	1111	-0.94503	-2538	2	66	66	0.89122	0	2	83	88	-0.27395	5	2	145	126	-1.13425	-19	2	101	84	-1.58348	-17	2	683	780	0.93533	97	2	33.1115	49.9122	Outlier	16.8007	Outlier	30.3	29.5	-0.28317	-0.8	2	27.7	29.3	0.5067	1.6	2	4.61	4.59	0.8068	-0.02
3	2294	3318	0.86354	1024	1	91	78	-0.93813	-13	1	67	71	-0.37669	4	2	121	105	-0.85457	-16	2	80	75	-0.33746	-5	2	669	720	-0.24885	51	1	42.6269	44.1159	-0.4035	1.48908	2	32.9	34.8	1.22087	1.9	1	28	27.3	-0.61209	-0.7	1	4.42	4.09	-0.20295	-0.33
5	5485	1222	-1.82088	-4263	2	55	60	1.59482	5	2	60	87	1.98617	27	1	106	91	-0.76135	-15	2	76	61	-1.37581	-15	2	664	696	-0.73797	32	1	32.4221	29.5433	Outlier	-2.87879	Outlier	28.2	25.4	-1.39726	-2.8	2	27	27.4	-0.07702	0.4	2	5.27	4.8	-0.65897	-0.47
6	4128	5170	0.87268	1042	1	55	37	-1.64173	-18	1	83	81	-0.99309	-2	2	110	106	0.26414	-4	1	63	62	0.07788	-1	2	708	780	0.29175	72	2	42.7659	45.2678	-0.22283	2.50194	1	17.9	17.4	-0.11605	-0.5	2	40.4	40.3	-0.32023	-0.1	1	4.4	3.56	-1.86416	-0.84
7	6578	3021	-1.46242	-3557	2	62	x	x	x	x	x	x	x	x	x	112	108	0.26414	-4	1	76	71	-0.33746	-5	2	668	726	-0.06865	58	1	47.8991	43.1501	-1.52366	-4.74901	2	27.9	29.8	1.22087	1.9	1	31.2	29.9	-0.90395	-1.3	1	5.35	4.96	-0.39839	-0.39
8	3913	3349	0.05725	-564	1	85	x	x	x	x	79	x	x	x		104	113	1.47608	9	1	68	84	1.84307	16	1	674	785	1.29573	111	2	44.5591	49.5	0.21078	4.94094	1	31.3	32	0.55241	0.7	1	29.1	28.5	-0.56345	-0.6	1	4.61	4.74	1.29539	0.13
9	3574	4443	0.78484	869	1	65	60	0.18763	-5	2	96	94	-0.99309	-2	2	123	107	-0.85457	-16	2	75	78	0.49322	3	1	676	639	Outlier	-37	Outlier	32.3851	36.3535	0.04818	3.96832	1	36.8	35.5	-0.56169	-1.3	2	25.4	25.9	-0.02838	0.5	2	4.58	4.45	0.4485	-0.13
10	x	x	x	x	x	x	x	x	x	x	x	x	x	x	x	x	x	x	x	x	x	x	x	x	x	x	x	x	x	x	x	x	x	x	x	x	x	x	x	x	x	x	x	x	x	5.23	5.59	2.04456	0.36
11	1938	3925	1.35249	1987	1	76	65	-0.65669	-11	1	95	98	-0.47942	3	2	100	111	1.66253	11	1	65	67	0.38938	2	1	713	794	0.52344	81	2	32.2948	41.8599	1.05994	9.56509	1	30.5	30.3	0.05106	-0.2	1	26.9	27.4	-0.02838	0.5	2	5.48	5.04	-0.56125	-0.44
12	3366	3115	0.21617	-251	1	x	x	x	x	x	90	x	x	x		113	116	0.91672	3	1	56	62	0.80472	6	1	741	794	-0.19736	53	1	40.3894	41.4756	-0.47577	1.0862	2	18.1	15.6	-1.23015	-2.5	2	35.8	42.2	Outlier	6.4	Outlier	5.12	4.64	-0.69154	-0.48
13	4306	4469	0.42637	163	1	71	69	0.60978	-2	2	71	79	0.03424	8	2	111	111	0.63704	0	1	70	79	1.11622	9	1	585	676	0.78087	91	2	37.1186	41.1615	0.04818	4.0429	1	39.9	41.4	0.99805	1.5	1	26.7	25.7	-0.75802	-1	1	5	4.61	-0.39839	-0.39
14	5079	3172	-0.62465	-1907	2	77	73	0.32835	-4	2	85	105	1.26704	20	1	126	109	-0.9478	-17	2	80	75	-0.33746	-5	2	630	709	0.47196	79	2	28.811	31.8878	-0.11443	3.07677	1	38.2	35.4	-1.39726	-2.8	2	25.4	26.9	0.45806	1.5	2	4.41	4.27	0.41593	-0.14
Zscore values
	Actigraph sedentary status06					Resting HR06					Recovery HR06					Systolic BP06					Diastolic BP06					6minuteWT06					relVO2max06					BodyFat%06					MuscleMass%06					Glucose06
Absolute= (m2-m1)	Low PA	High PA				1	2				1	2				1	2				1	2				1	2				0.21078	-0.4035				1	2				1	2				1	2
Missing values (X)	0.27964	-0.94503				-0.37525	0.89122				1.98617	-0.17122				0.26414	-0.66812				1.84307	-0.7528				-0.53202	0.93533				-0.22283	-1.52366				0.94234	-0.28317				-0.51481	0.5067				-0.23553	0.8068
	0.86354	-1.82088				-0.93813	1.59482				1.26704	-0.27395				0.26414	-1.13425				0.49322	-1.58348				-0.24885	0.29175				0.21078	-0.47577				1.22087	-1.39726				-0.61209	-0.07702				-0.20295	1.29539
	0.87268	-1.46242				-1.64173	0.18763					-0.37669				1.47608	-0.85457				0.38938	-0.33746				-0.73797	1.29573				0.04818					1.22087	-0.11605				-0.32023	-0.02838				-0.65897	0.4485
	0.05725	-0.62465				-0.65669	0.60978					-0.99309				1.66253	-0.76135				0.80472	-1.37581				-0.06865	0.52344				1.05994					0.55241	-0.56169				-0.90395	-0.02838				-1.86416	2.04456
	0.78484						0.32835					-0.99309				0.91672	-0.85457				1.11622	0.07788				-0.19736	0.78087				0.04818					0.05106	-1.23015				-0.56345	0.45806				-0.39839	0.41593
	1.35249				Mean:	-0.90295	0.820863					-0.47942				0.63704	-0.9478					-0.33746					0.47196				-0.11443					0.99805	-1.39726				-0.75802					-0.56125
	0.21617				SD:	0.54349	0.591467					0.03424			Mean:	0.870108	-0.87011					-0.33746			Mean:	-0.35697	0.765424			Mean:	0.177229	-0.800977			Mean:	0.830933	-0.83093			Mean:	-0.612092	0.166196				-0.69154
	0.42637									Mean:	1.62661	-0.222585			SD:	0.597666	0.160572			Mean:	0.929322	-0.794334			SD:	0.272074	0.385115			SD:	0.420288	0.626904			SD:	0.45392	0.580417			SD:	0.201737	0.289828				-0.39839
Mean:	0.606623	-1.21324								SD:	0.508502	0.0726411								SD:	0.584618	0.694997																							Mean:	-0.626397	1.00224
SD:	0.434009	0.532194																																											SD:	0.531529	0.682084

Absolute change values
	Actigraph sedentary status06					Resting HR06					Recovery HR06					Systolic BP06					Diastolic BP06					6minuteWT06					relVO2max06					BodyFat%06					MuscleMass%06					Glucose06
	Low PA	High PA				1	2				1	2				1	2				1	2				1	2				1	2				1	2				1	2				1	2
	-126	-2538				-9	0				27	6				-4	-14				16	-9				40	97				4.9186	1.48908				1.4	-0.8				-0.5	1.6				-0.34	-0.02
	1024	-4263				-13	5				20	5				-4	-19				3	-17				51	72				2.50194	-4.74901				1.9	-2.8				-0.7	0.4				-0.33	0.13
	1042	-3557				-18	-5					4				9	-16				2	-5				32	111				4.94094	1.0862				1.9	-0.5				-0.1	0.5				-0.47	-0.13
	-564	-1907				-11	-2					-2				11	-15				6	-15				58	81				3.96832					0.7	-1.3				-1.3	0.5				-0.84	0.36
	869						-4					-2				3	-16				9	-1				53	91				9.56509					-0.2	-2.5				-0.6	1.5				-0.39	-0.14
	1987				Mean:	-12.75	-0.5					3				0	-17					-5					79				4.0429					1.5	-2.8				-1					-0.44
	-251				SD:	3.86221	4.20317					8			Mean:	2.5	-16.1667					-5			Mean:	46.8	90.4				3.07677				Mean:	1.2	-1.78333			Mean:	-0.7	0.9				-0.48
	163														SD:	6.41093	1.7224			Mean:	7.2	-9.4			SD:	10.5688	14.9599			Mean:	4.71636	-0.724575			SD:	0.814862	1.04195			SD:	0.414729	0.595819				-0.39
Mean:	518	-3066.25								Mean:	23.5	5.5								SD:	5.63028	6.69328								SD:	2.31684	3.49108													Mean:	-0.46	0.04
SD:	854.787	1048.17								SD:	4.94975	0.707107																																	SD:	0.163183	0.209404

Figure legend: Raw data, absolute change and Z-score values of all tested parameters before (0) and after 6 months (6).
[truncated: 36 more columns]
